# Supplementary material
Source: HighWire-hosted journal article supplement (https://jnis.bmj.com/content/11/5/455)
Supplement: inline-supplementary-material-4 [file inline-supplementary-material-4.docx]

|  | **SUT** | | **RID** | |  |
| --- | --- | --- | --- | --- | --- |
| **Site of occlusion** | **Number of patients** | **Number of recanalized patients** | **Number of patients** | **Number of recanalized patients** | **p** |
| ICA terminus | 12 | 8 | 7 | 6 | 0.602 |
| MCA M1 | 14 | 11 | 10 | 8 | 0.667 |
| MCA M2 | 4 | 3 | 3 | 3 | 0.571 |
| BA | 8 | 5 | 3 | 2 | 0.721 |

**Table 4:** Statistical comparison of both technique.
